# Supplementary material for: GLUT1-mediated selective tumor targeting with fluorine containing platinum(II) glycoconjugates
Source: Oncotarget. 2017 Apr 13;8(24):39476–96. doi: 10.18632/oncotarget.17073 (PMC5503626; doi:10.18632/oncotarget.17073)
Supplement: Supplementary file 1 [file oncotarget-08-39476-s001.pdf]

# GLUT1-mediated selective tumor targeting with fluorine containing platinum(II) glycoconjugates

## SUPPLEMENTARY MATERIALS

## SUPPLEMENTARY FIGURES AND TABLES

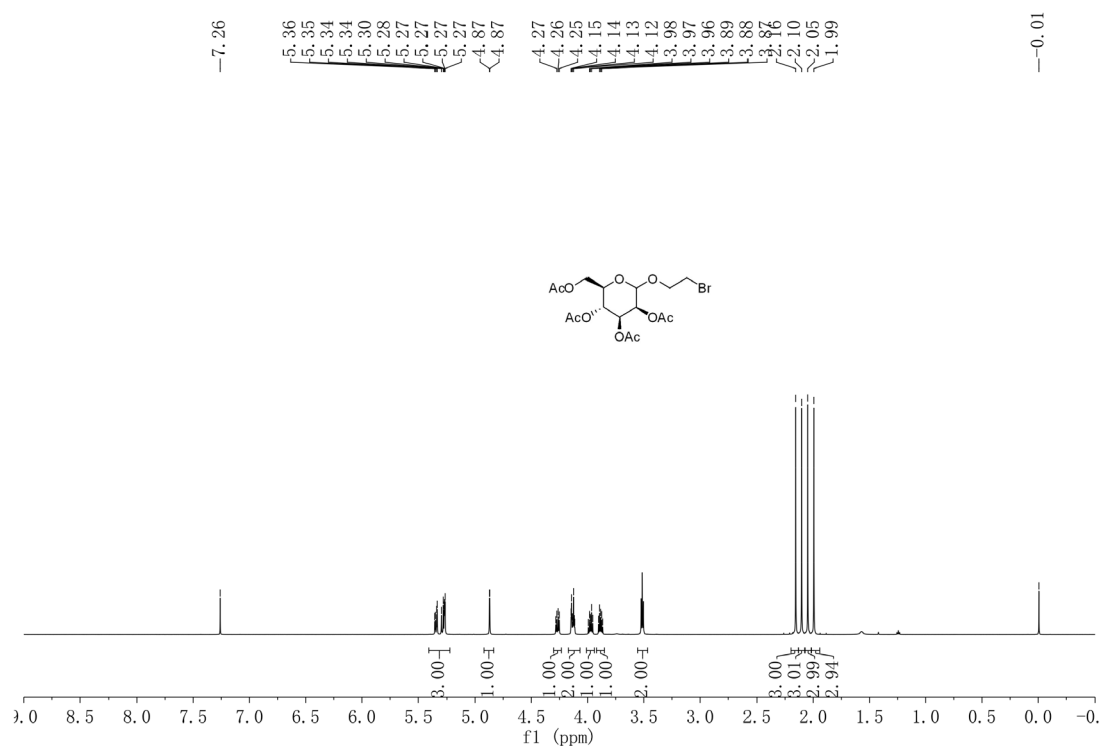

Supplementary Figure 1: <sup>1</sup>H-NMR of compound 1b.

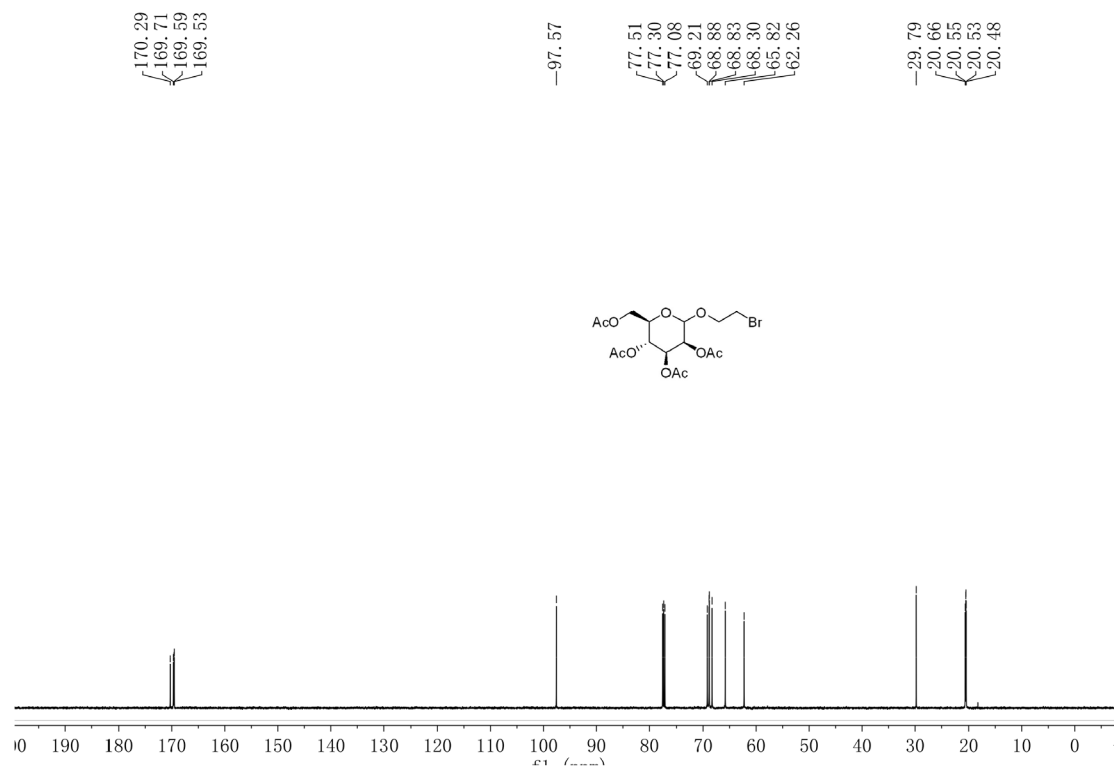

Supplementary Figure 2:  $^{13}\text{C}$ -NMR of compound 1b.

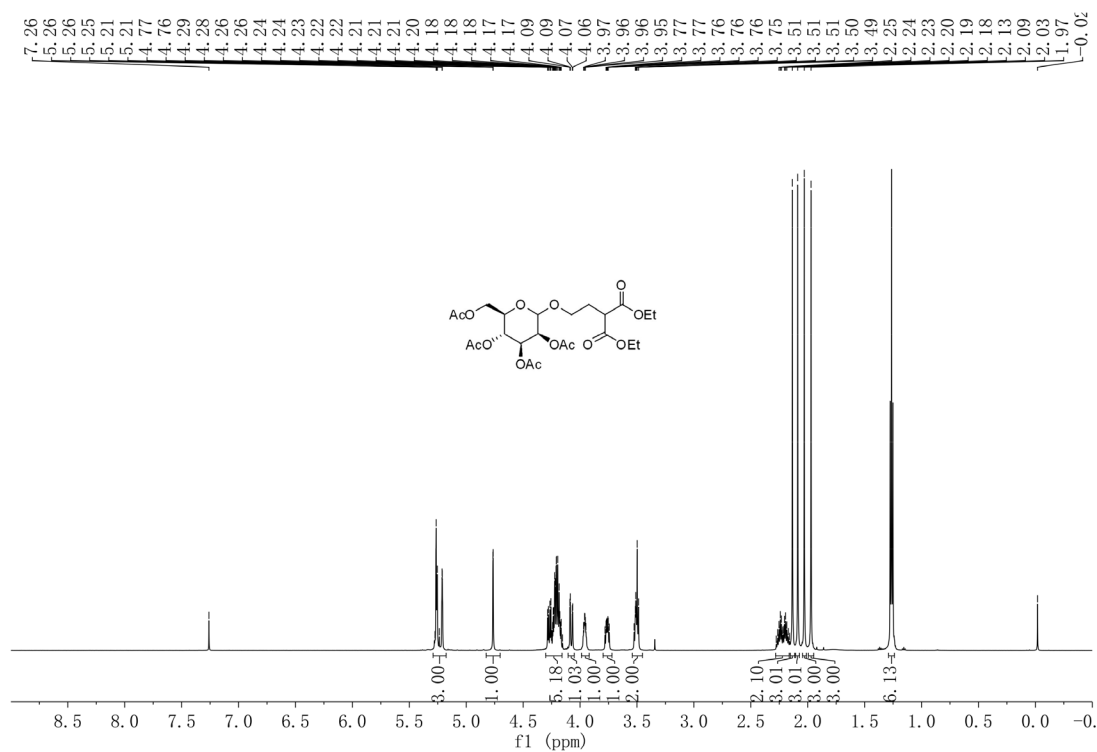

Supplementary Figure 3: <sup>1</sup>H-NMR of compound 2b.

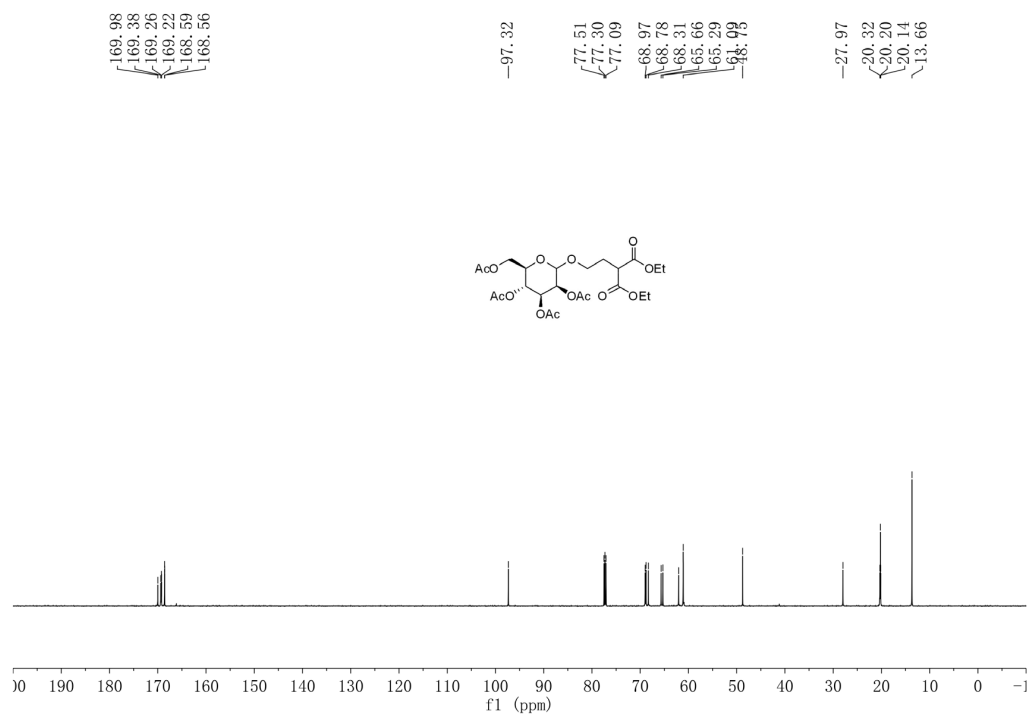

Supplementary Figure 4: <sup>13</sup>C-NMR of compound 2b.

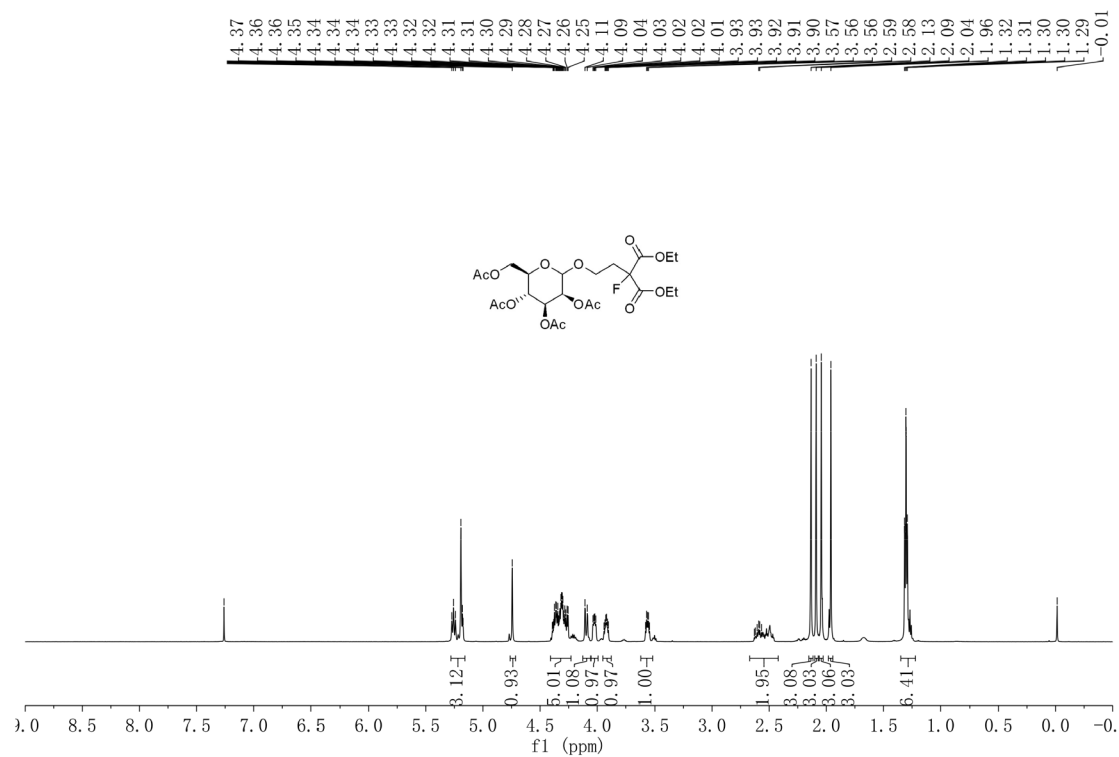Supplementary Figure 5: <sup>1</sup>H-NMR of compound 3b.

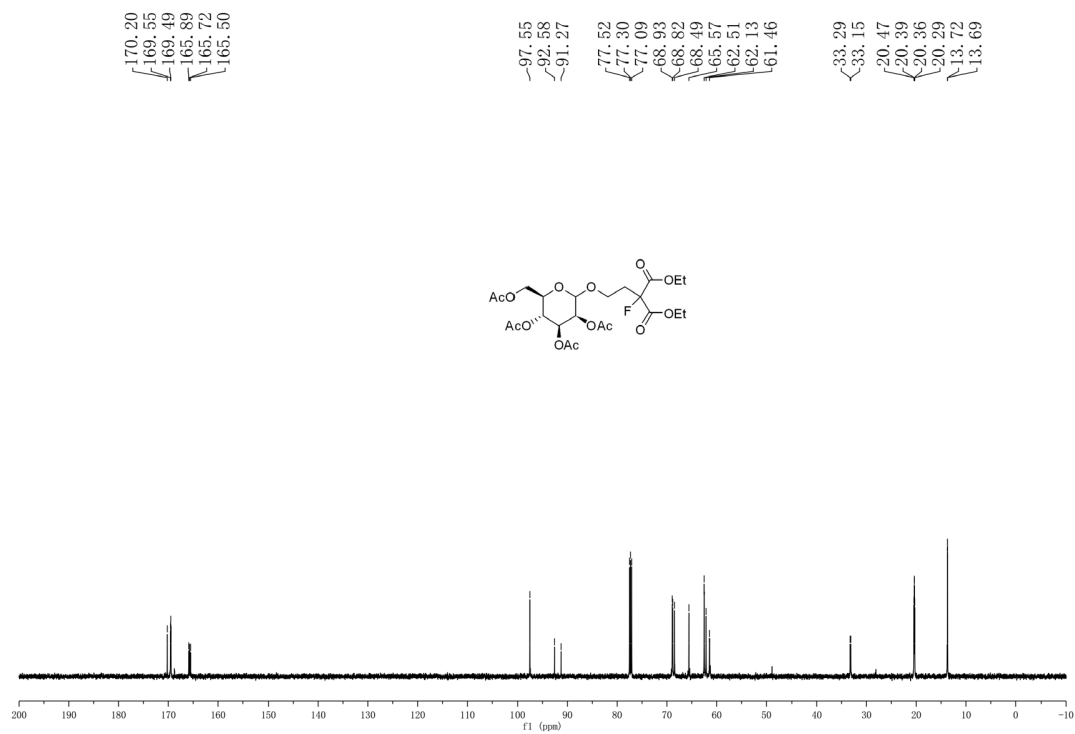Supplementary Figure 6: <sup>13</sup>C-NMR of compound 3b.

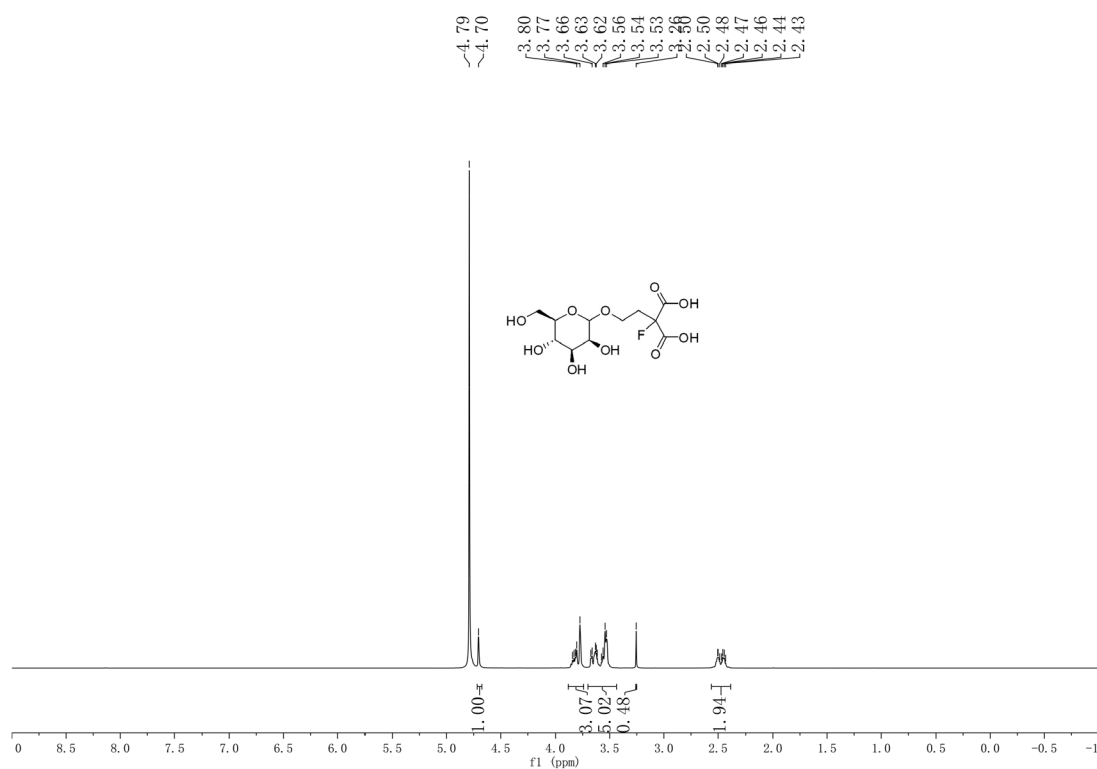

Supplementary Figure 7: <sup>1</sup>H-NMR of compound 4b.

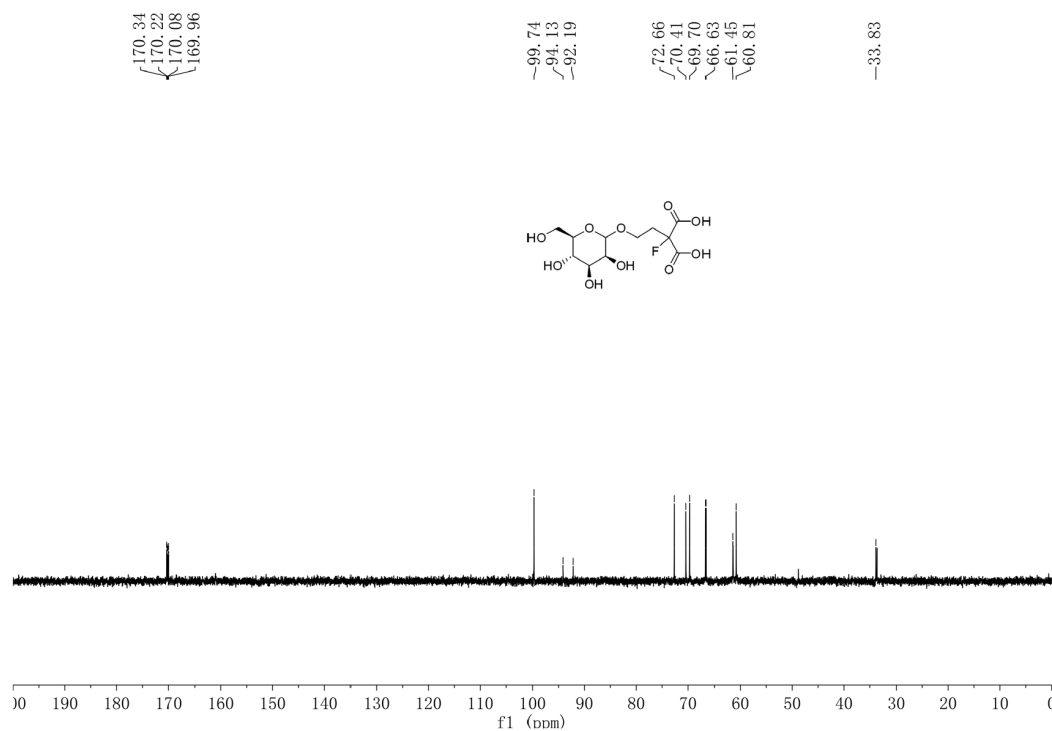

Supplementary Figure 8:  $^{13}\text{C}$ -NMR of compound 4b.

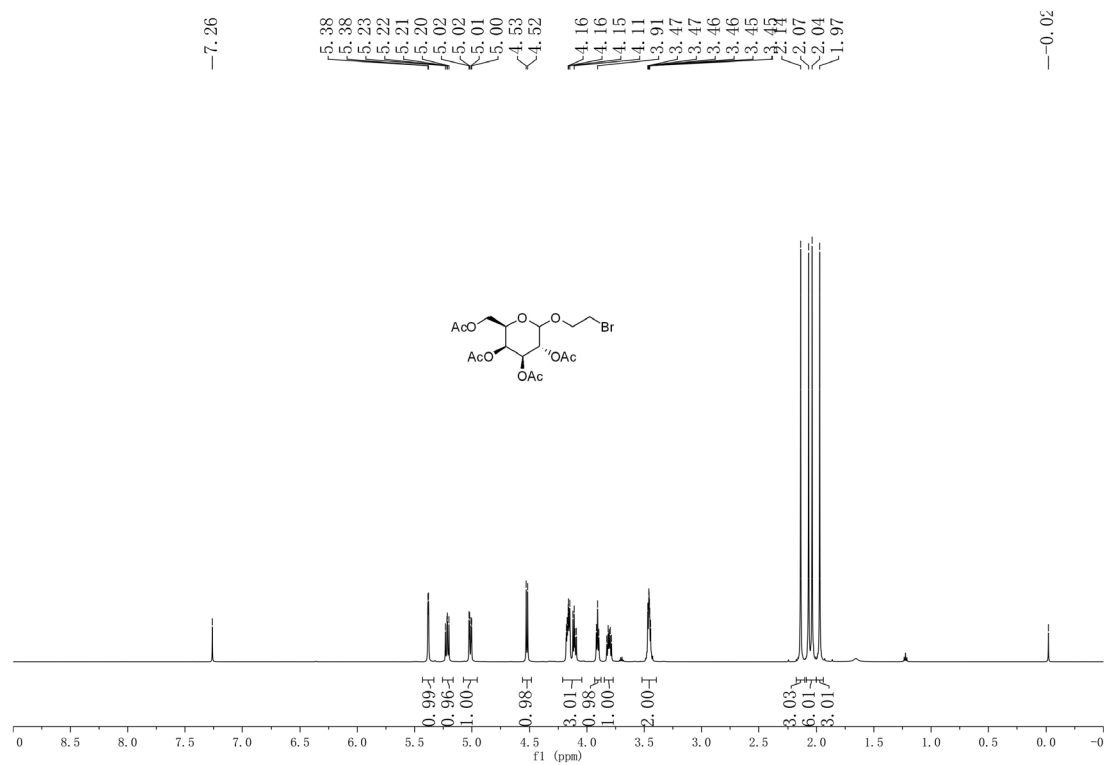Supplementary Figure 9: <sup>1</sup>H-NMR of compound 1c.

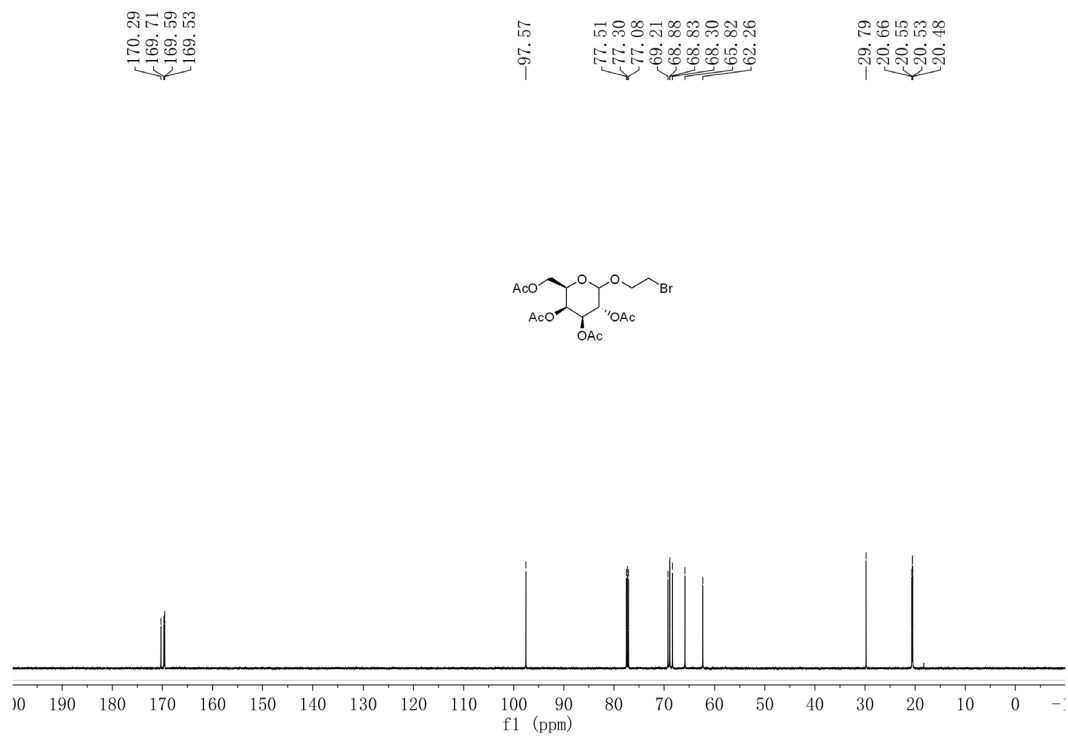Supplementary Figure 10: <sup>13</sup>C-NMR of compound 1c.

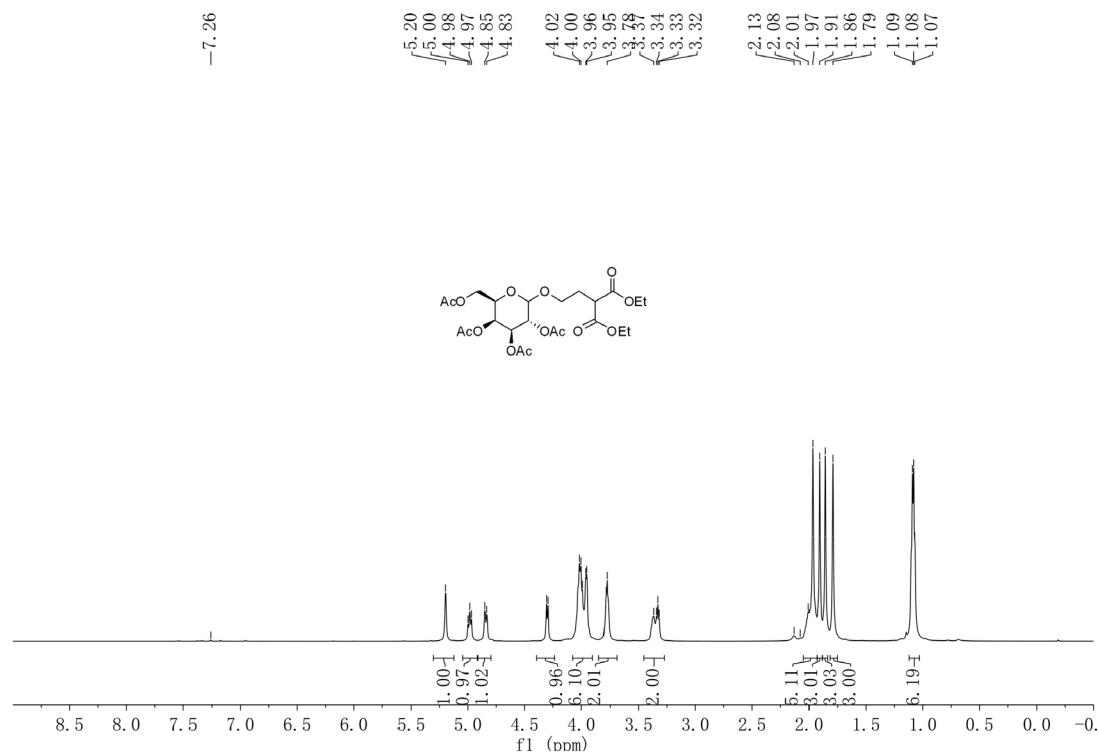Supplementary Figure 11: <sup>1</sup>H-NMR of compound 2c.

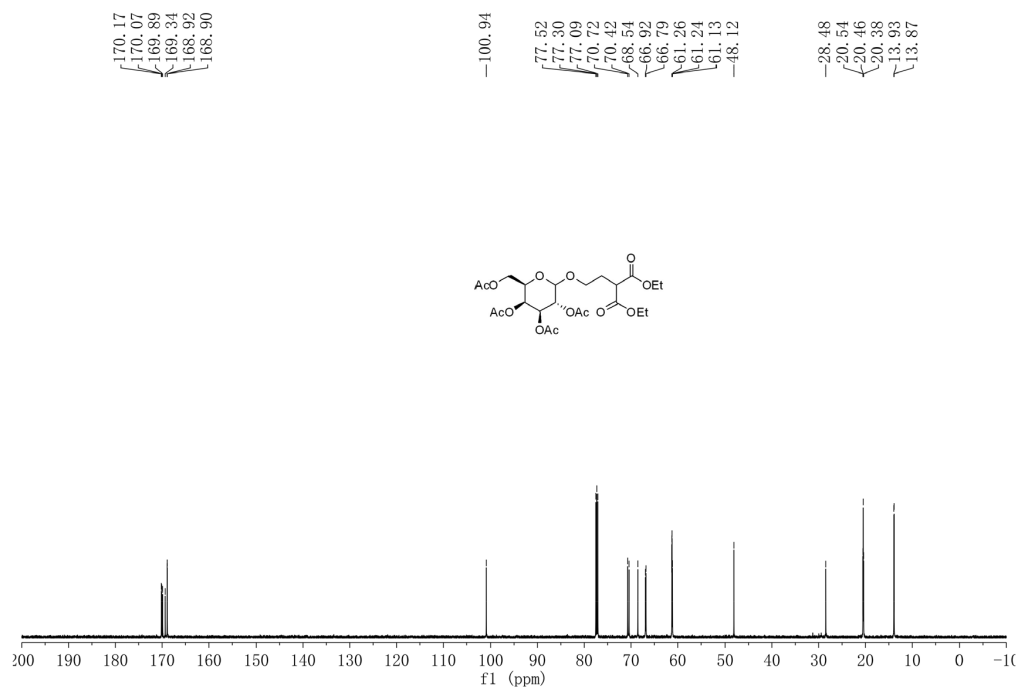Supplementary Figure 12: <sup>13</sup>C-NMR of compound 2c.

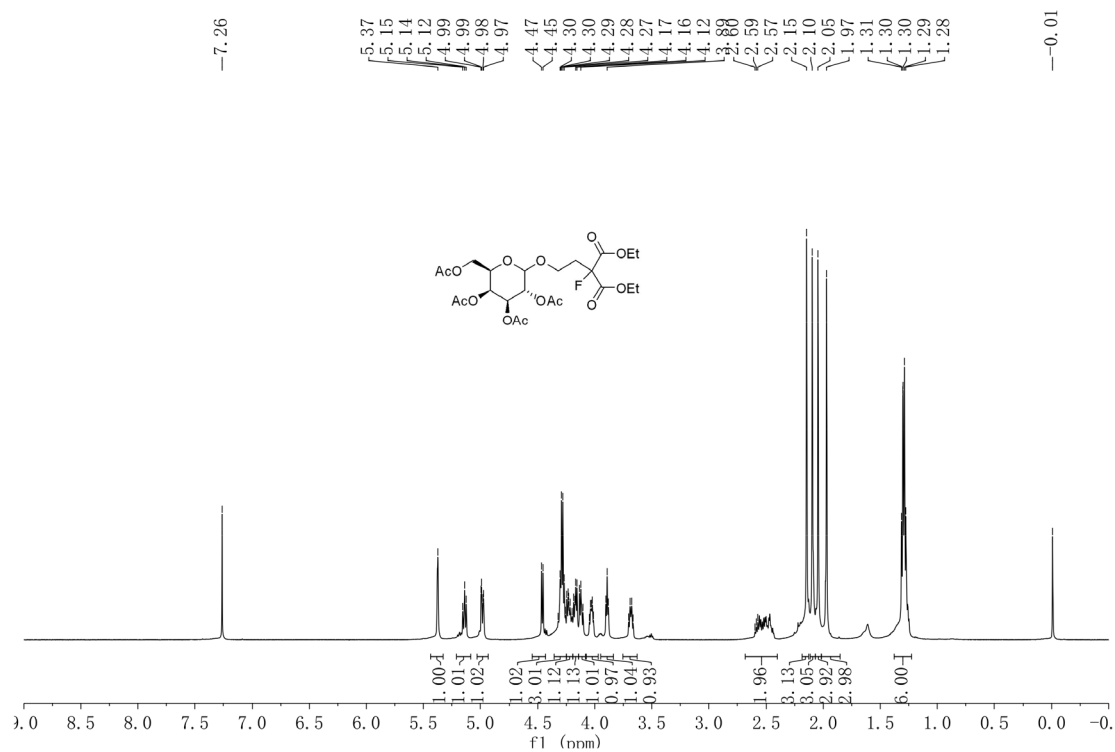Supplementary Figure 13:  $^1\text{H-NMR}$  of compound 3c.

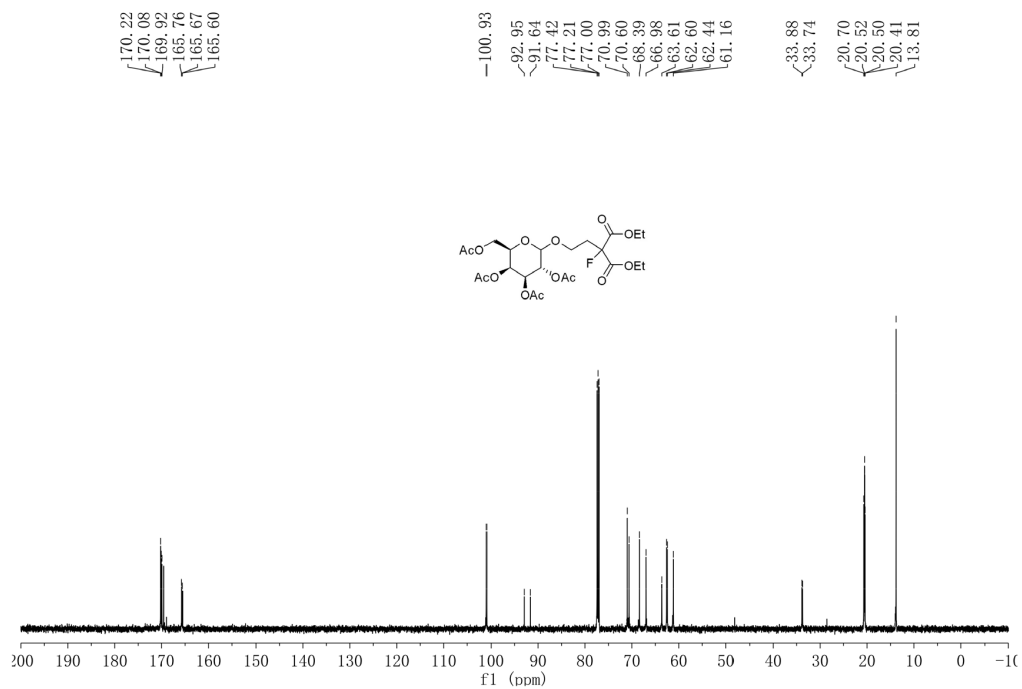

Supplementary Figure 14: <sup>13</sup>C-NMR of compound 3c.

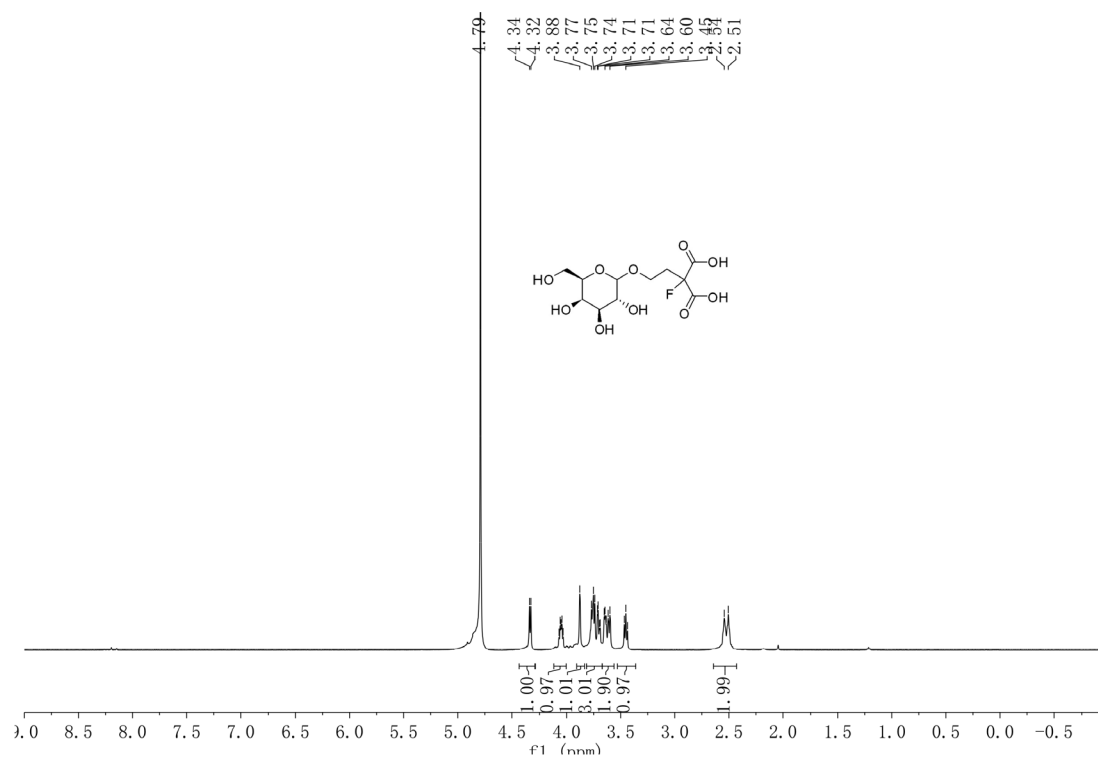

Supplementary Figure 15: <sup>1</sup>H-NMR of compound 4c.

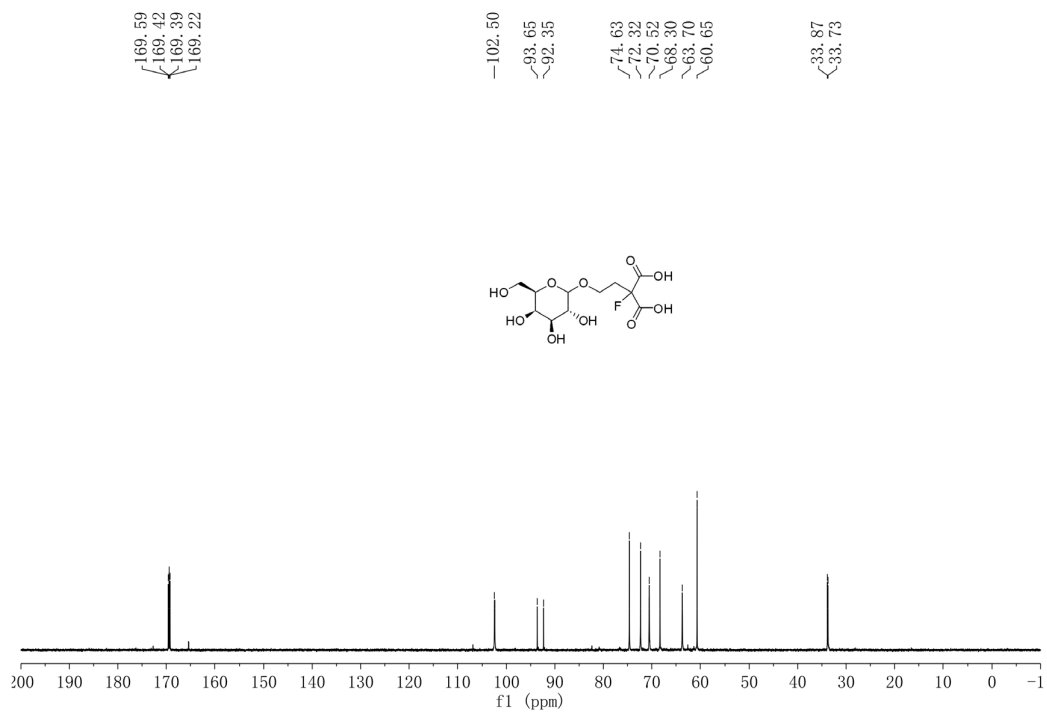Supplementary Figure 16: <sup>13</sup>C-NMR of compound 4c.

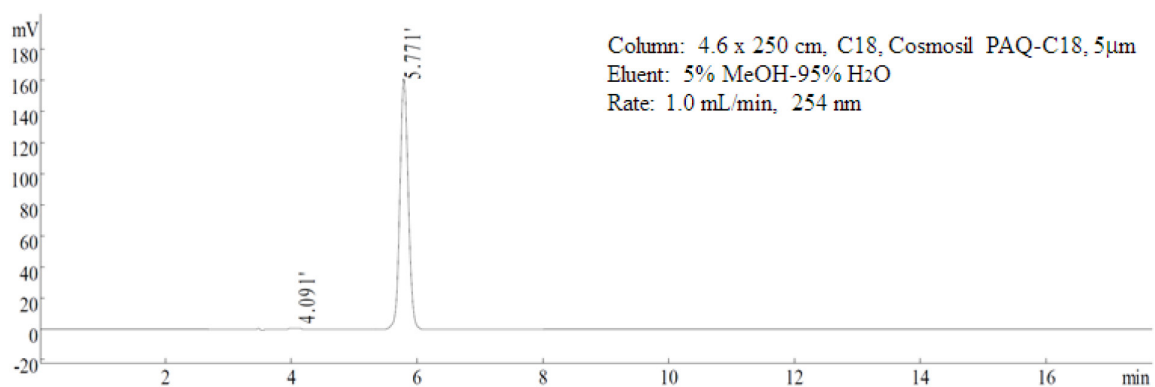

| No. | RT (min) | Concentration(%) | Area    | Height |
|-----|----------|------------------|---------|--------|
| 1   | 4.091    | 2.91             | 45455   | 1522   |
| 2   | 5.771    | 97.09            | 1516636 | 161993 |

Supplementary Figure 17: Purity confirmation of 5a by HPLC.

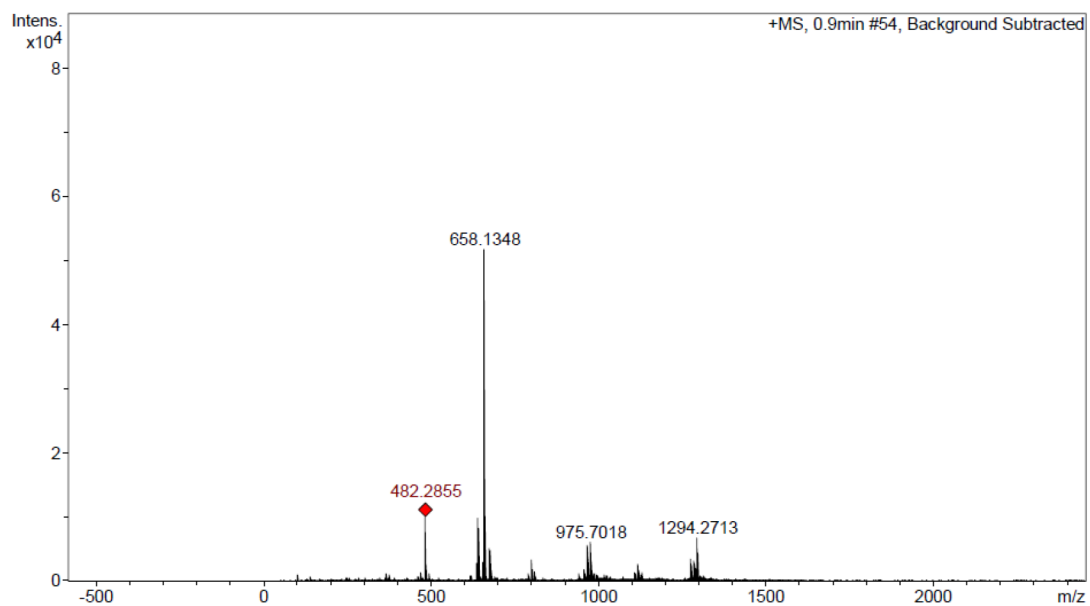

Supplementary Figure 18: Mass spectrum of compound 5a.

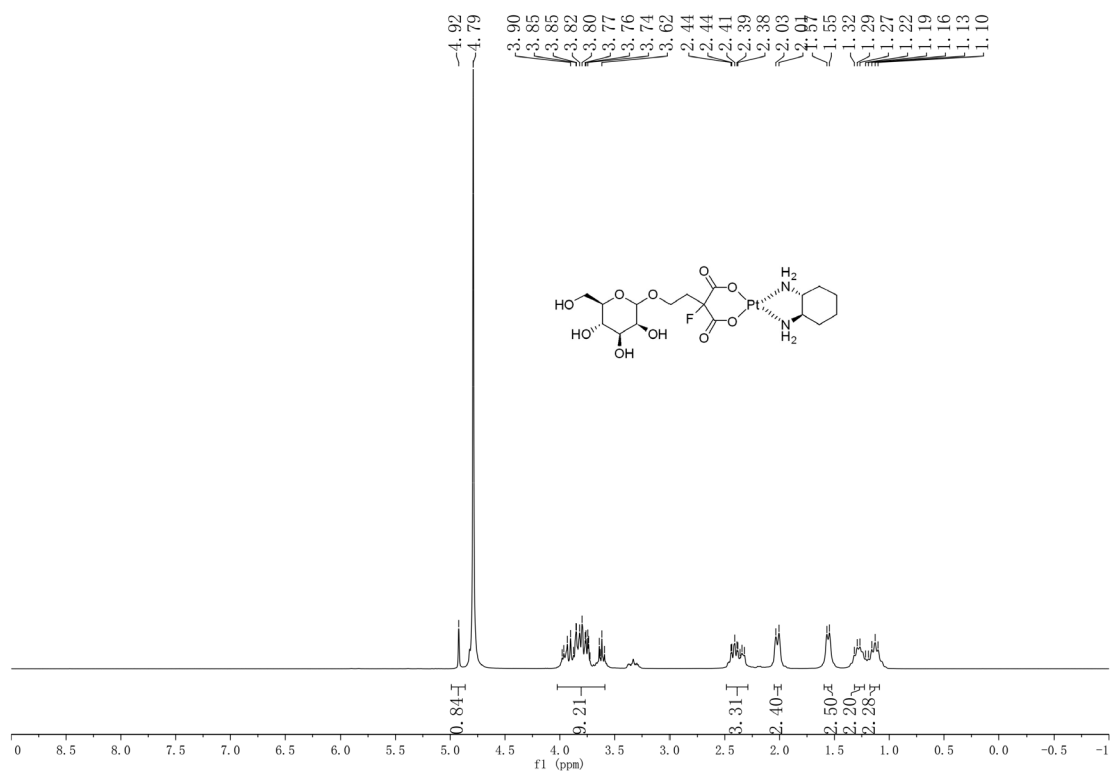

Supplementary Figure 19: <sup>1</sup>H-NMR of compound 5b.

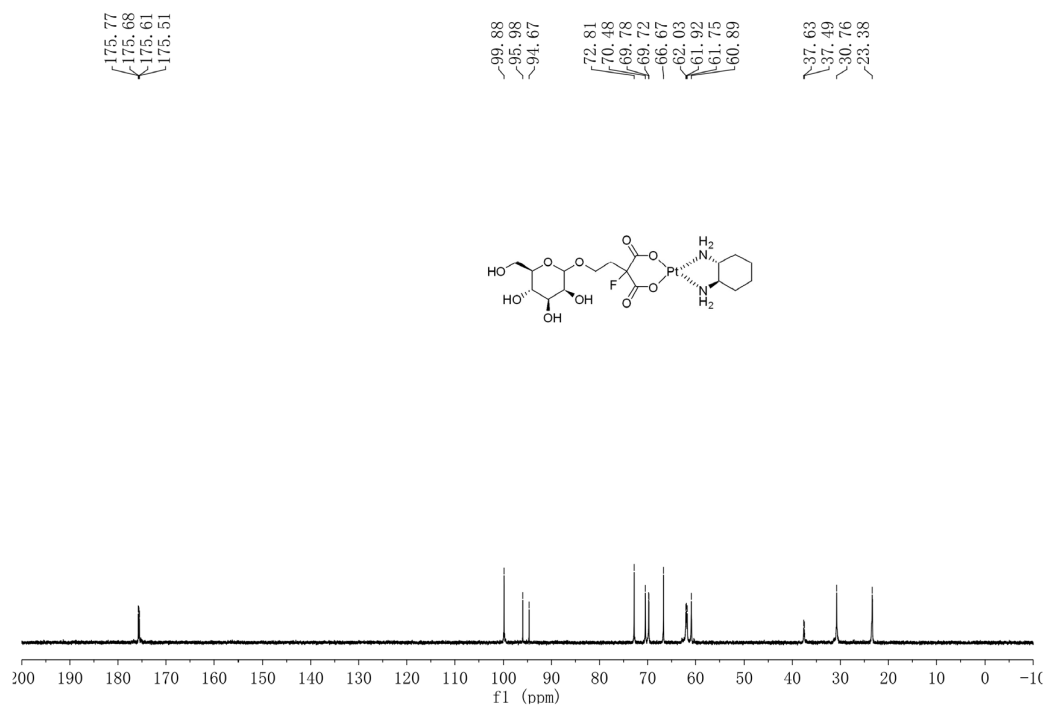

Supplementary Figure 20: <sup>13</sup>C-NMR of compound 5b.

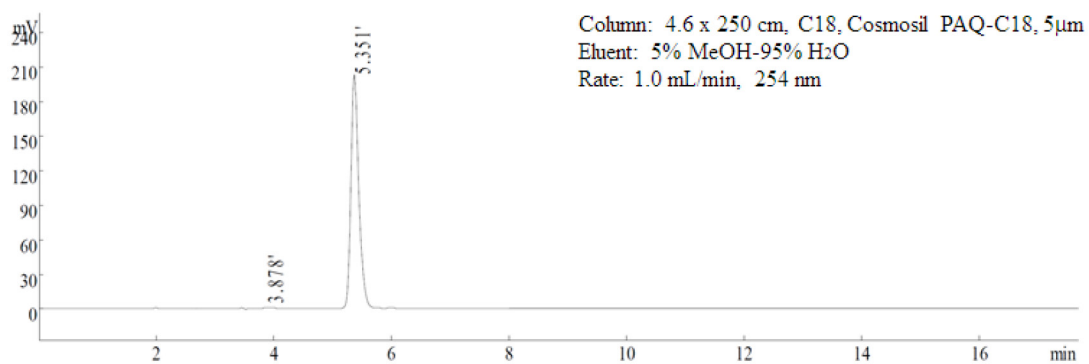

| No. | RT (min) | Concentration(%) | Area    | Height |
|-----|----------|------------------|---------|--------|
| 1   | 3.878    | 1.547            | 29820   | 1530   |
| 2   | 5.351    | 98.46            | 1897343 | 203958 |

Supplementary Figure 21: Purity confirmation of 5b by HPLC.

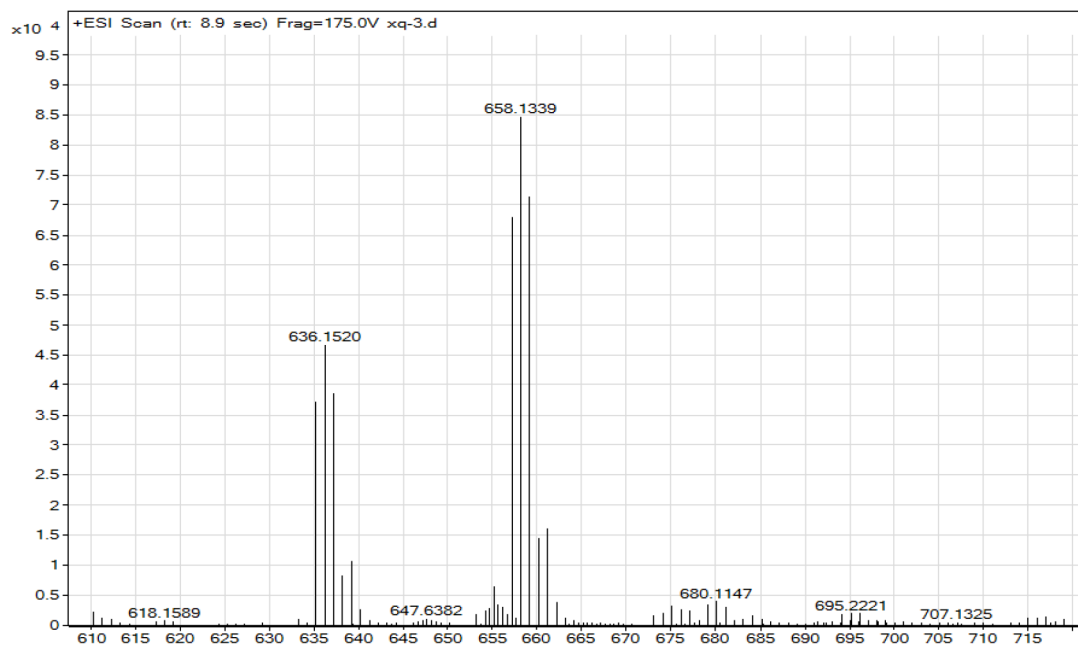

Supplementary Figure 22: Mass spectrum of compound 5b.

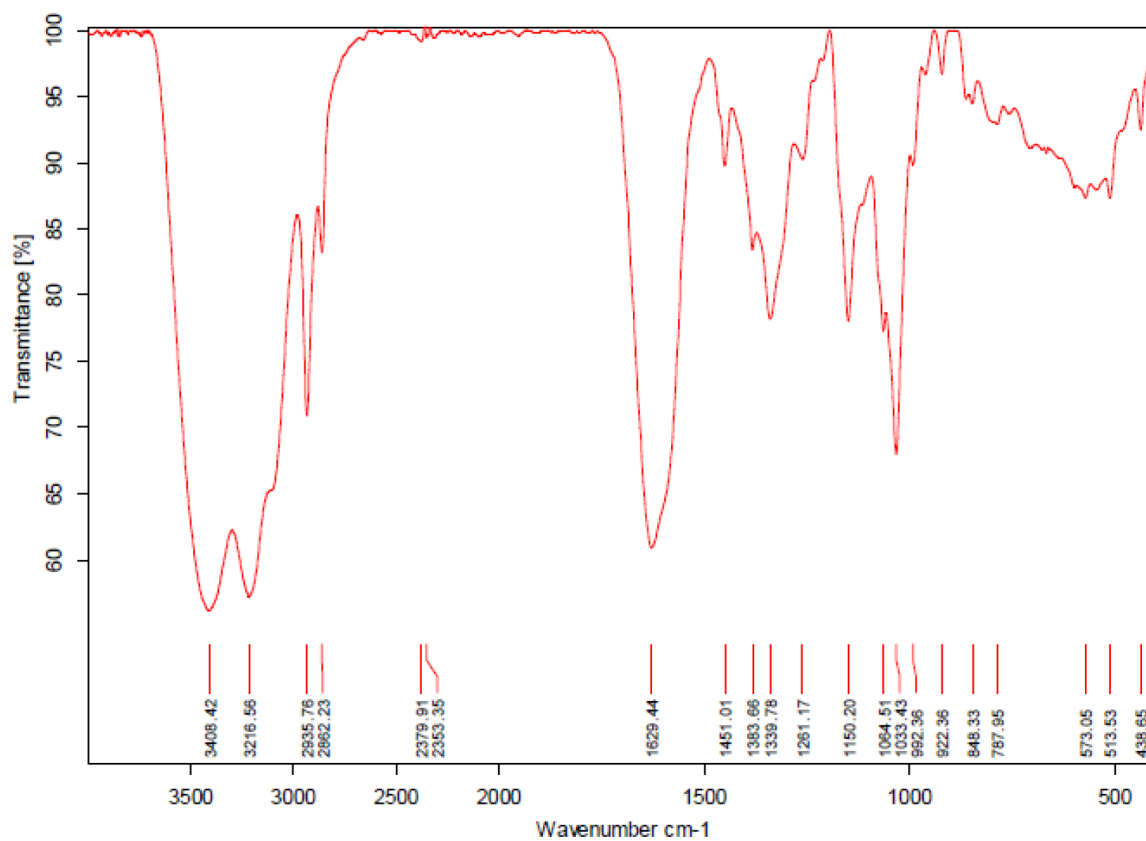

Supplementary Figure 23: IR spectrum of compound 5b.

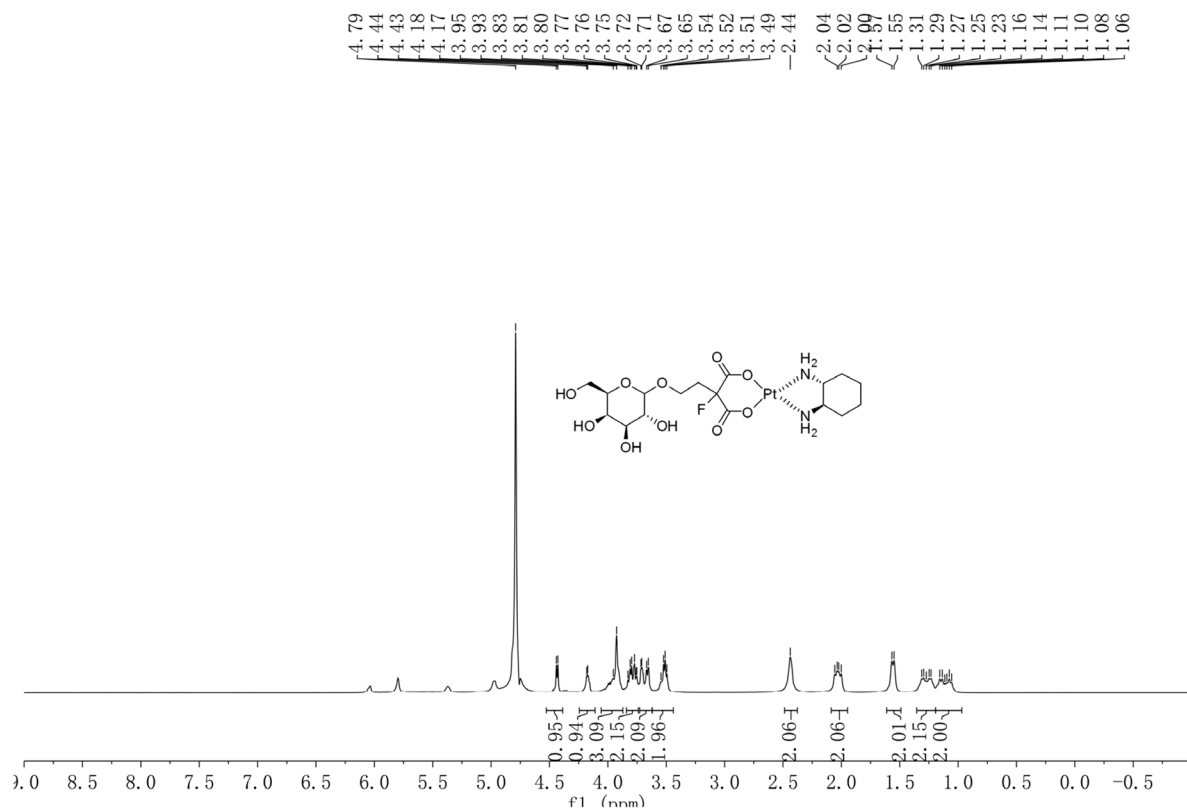

Supplementary Figure 24: <sup>1</sup>H-NMR of compound 5c.

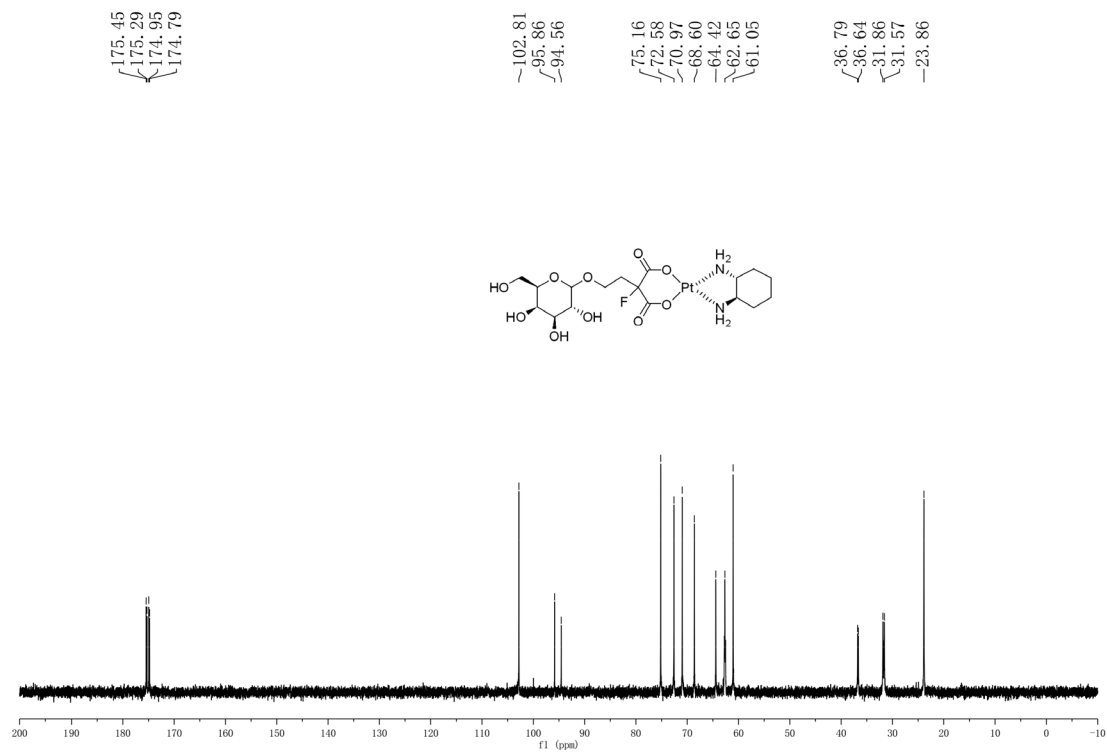

Supplementary Figure 25:  $^{13}\text{C}$ -NMR of compound 5c.

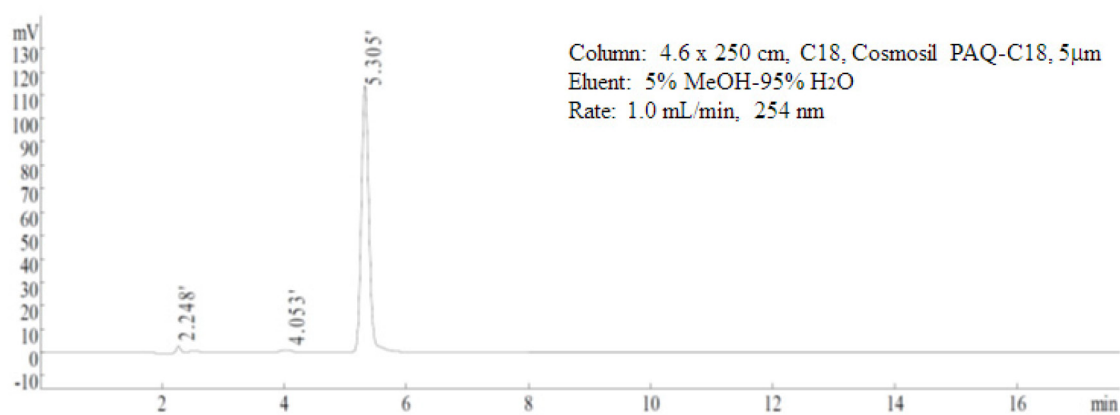

| No. | RT (min) | Concentration(%) | Area    | Height |
|-----|----------|------------------|---------|--------|
| 1   | 2.248    | 1.594            | 16525   | 3292   |
| 2   | 4.053    | 1.439            | 14922   | 1012   |
| 3   | 5.305    | 96.96            | 1005108 | 114608 |

Supplementary Figure 26: Purity confirmation of 5c by HPLC.

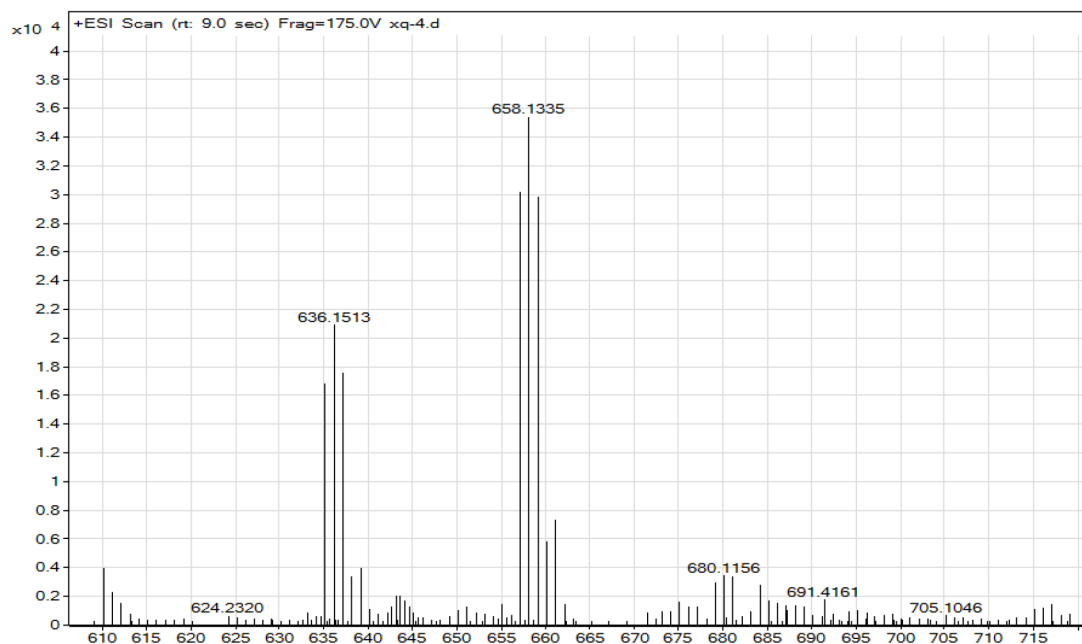

Supplementary Figure 27: Mass spectrum of compound 5c.

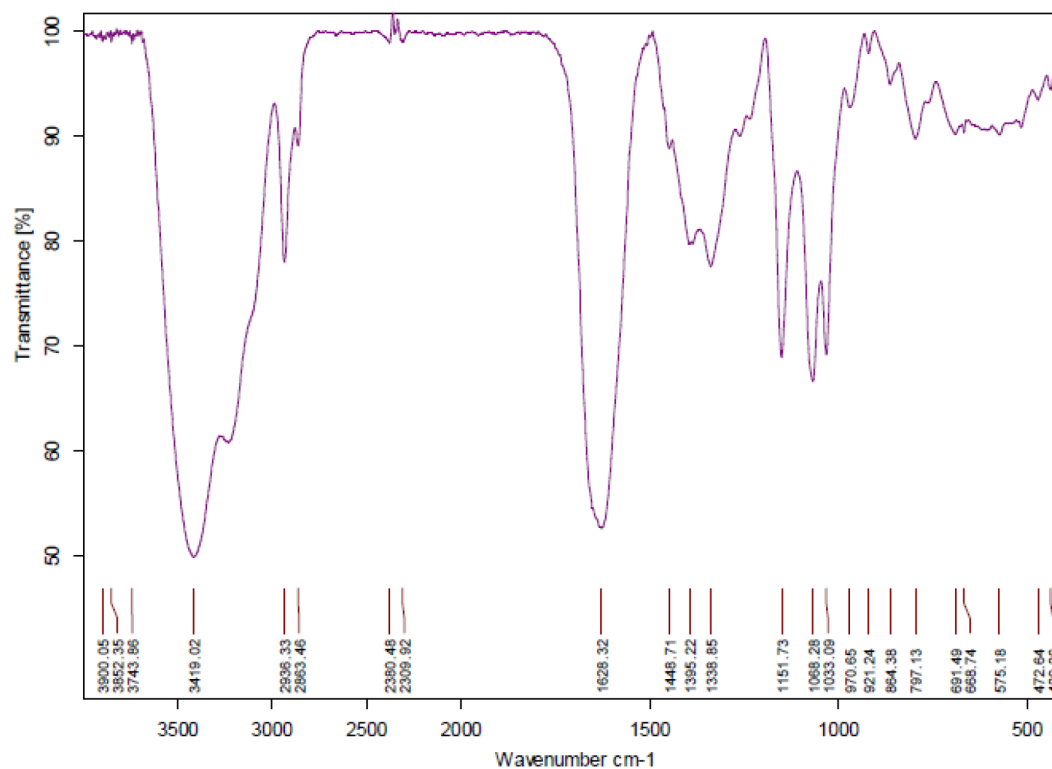

Supplementary Figure 28: IR spectrum of compound 5c.

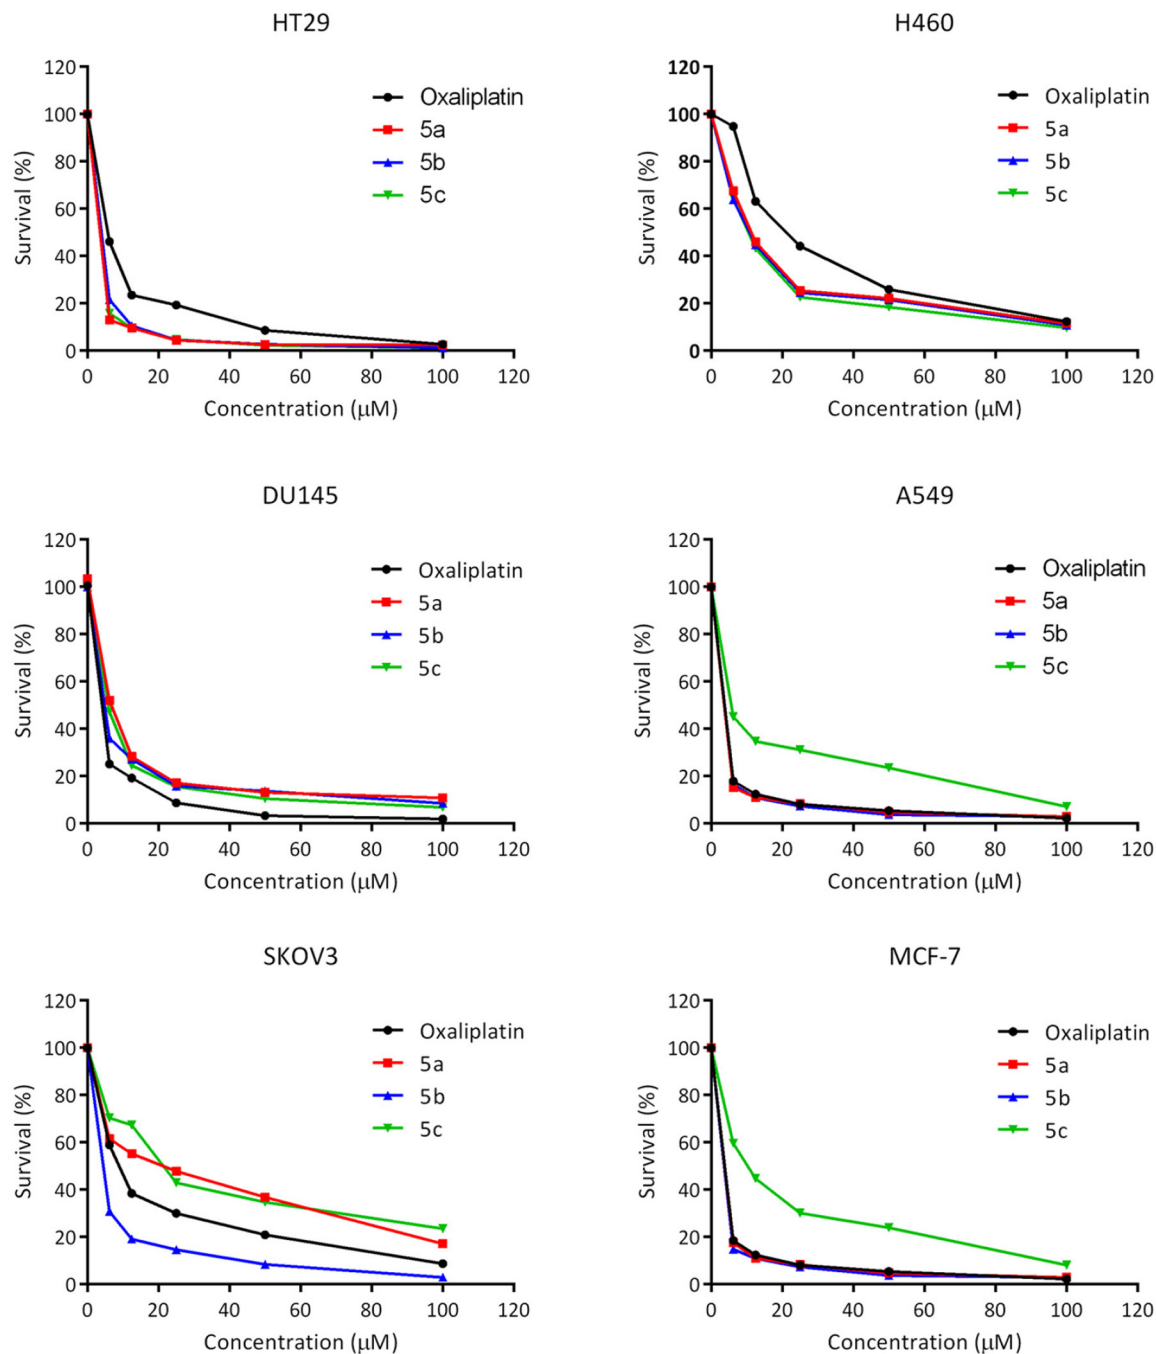

**Supplementary Figure 29: Cytotoxicity assays (MTS assays).** concentration response curves of six cancer cell lines (HT29, H460, DU145, A549, SKOV3, MCF-7) treated with sugar conjugated platinum complexes 5a, 5b, 5c and oxaliplatin.

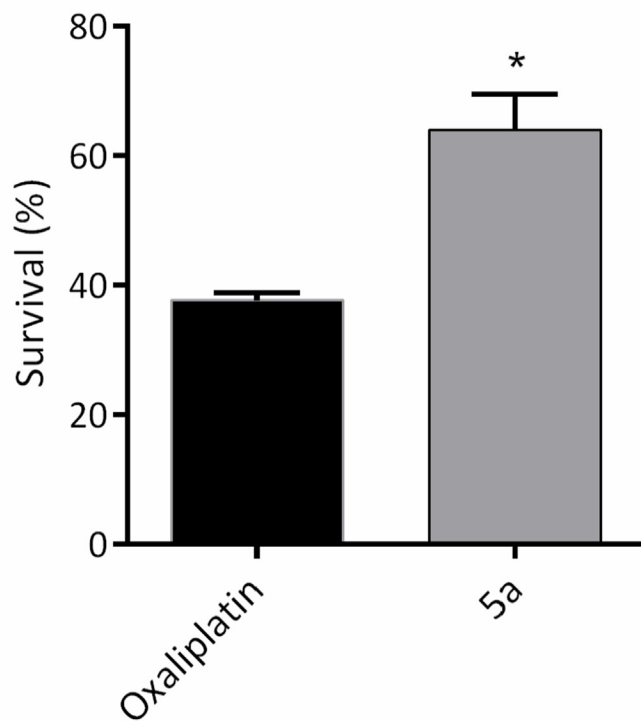

**Supplementary Figure 30: Cytotoxicity assays on EBAS-2B-CM.** survival rates of normal epithelial cells after 72 h treatment with sugar conjugated platinum complexes 5a and oxaliplatin (6.25 $\mu$ M each) (\*  $p < 0.05$  compared to oxaliplatin group).
